# Supplementary material
Source: PubMed Central journal article supplement (PMC3560936)
Supplement: NIHMS420414-supplement-3.pdf [file NIHMS420414-supplement-3.pdf]

**Supplementary Table 1:** Criteria used by the surgeon to classify measurement sites

| <b>Category</b>     | <b>Criteria</b>                                                                                                                                                                                                                                                                     |
|---------------------|-------------------------------------------------------------------------------------------------------------------------------------------------------------------------------------------------------------------------------------------------------------------------------------|
| Normal / Benign     | Clinical appearance of normal mucosa, including intact mucosa and previously radiated or operated mucosa, with no ulcerations, no leukoplakia, no hyperkeratosis, no erythroplakia, and no mass effect.                                                                             |
| Abnormal, low-risk  | Abnormal clinical appearance, but no clinical features suggestive of dysplasia or cancer, including erythema and inflammation, hyperkeratosis, lichen planus, thin leukoplakia, trauma, mucositis, gingivitis, etc.                                                                 |
| Abnormal, high-risk | Abnormal clinical appearance worrisome for dysplasia or microinvasive carcinoma, but not suggestive of frankly invasive carcinoma. Includes sites with thick or heterogeneous leukoplakia, erythroplakia, thin ulcerations, suspicious leukoplakia but no obvious invasive disease. |
| Cancer              | Obvious invasive carcinoma.                                                                                                                                                                                                                                                         |

**Supplementary Table 2:** Scoring criteria for IHC stained sites

| <b>IHC marker</b> | <b>Staining pattern</b>           | <b>IHC expression (score)</b> |
|-------------------|-----------------------------------|-------------------------------|
| Ki-67             | Basal layer only                  | Low (1)                       |
|                   | Confined to lower 1/3 epithelium  | Moderate (2)                  |
|                   | Mid- or full-thickness epithelium | High (3)                      |
| p63               | Confined to lower 1/3 epithelium  | Low (1)                       |
|                   | Above lower 1/3 epithelium        | High (3)                      |
| PHH3              | Confined to basal layer only      | Low (1)                       |
|                   | Staining in lower 1/3 or above    | High (3)                      |

**Supplementary Table 3:** Distribution of measurement sites by anatomical location

| <b>Anatomical location</b> | <b>Number of sites</b> |
|----------------------------|------------------------|
| Tongue                     | 61                     |
| Floor of mouth             | 15                     |
| Buccal mucosa              | 7                      |
| Gingiva / Alveolar ridge   | 7                      |
| Palate                     | 4                      |
| Lip                        | 3                      |
| Retromolar trigone         | 3                      |
| <b>Total</b>               | <b>100</b>             |

**Supplementary Table 4:** Distribution of measurement sites by clinical impression and pathology diagnosis

|                            |                     | <b>Pathology diagnosis</b> |                       |                           |                         |               | <b>Total</b> |
|----------------------------|---------------------|----------------------------|-----------------------|---------------------------|-------------------------|---------------|--------------|
|                            |                     | <b>Normal</b>              | <b>Mild dysplasia</b> | <b>Moderate dysplasia</b> | <b>Severe dysplasia</b> | <b>Cancer</b> |              |
| <b>Clinical impression</b> | Normal              | 33                         | 5                     | 2                         | 0                       | 0             | 40           |
|                            | Abnormal, low-risk  | 8                          | 11                    | 4                         | 2                       | 1             | 26           |
|                            | Abnormal, high-risk | 4                          | 1                     | 5                         | 4                       | 6             | 20           |
|                            | Cancer              | 0                          | 0                     | 3                         | 0                       | 11            | 14           |
| <b>Total</b>               |                     | <b>45</b>                  | <b>17</b>             | <b>14</b>                 | <b>6</b>                | <b>18</b>     | <b>100</b>   |
